# Supplementary material
Source: publisher site journal article supplement (https://www.dovepress.com/get_supplementary_file.php?f=256989.docx)

Supplementary Figure 1.The top 50 of differential lncRNA expression was extracted to draw the cluster heat map of differential lncRNA expression.


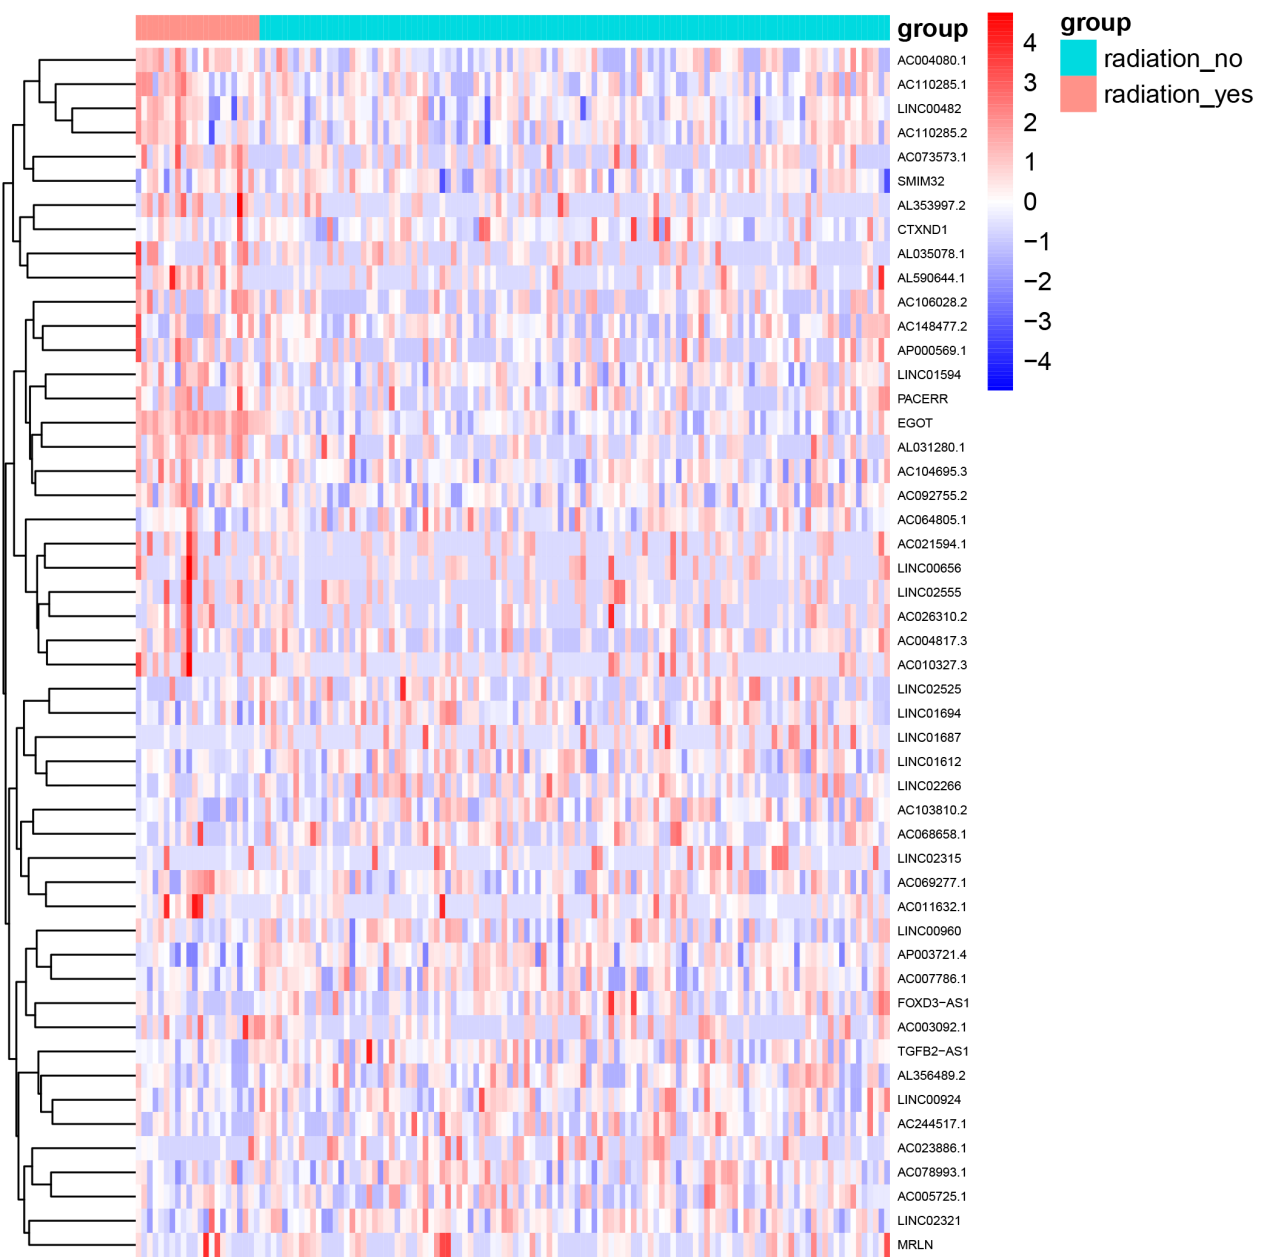

Supplement: Supplementary file 1 [file get_supplementary_file.php]
